# Supplementary material for: In Vitro Evaluation of Probiotic Properties of Two Novel Probiotic Mixtures, Consti-Biome and Sensi-Biome
Source: PubMed Central journal article supplement (PMC10580887; doi:10.4014/jmb.2303.03011), 2023-06-19
Supplement: jmb-33-9-1149-supple.pdf [file jmb-33-9-1149-supple.pdf]

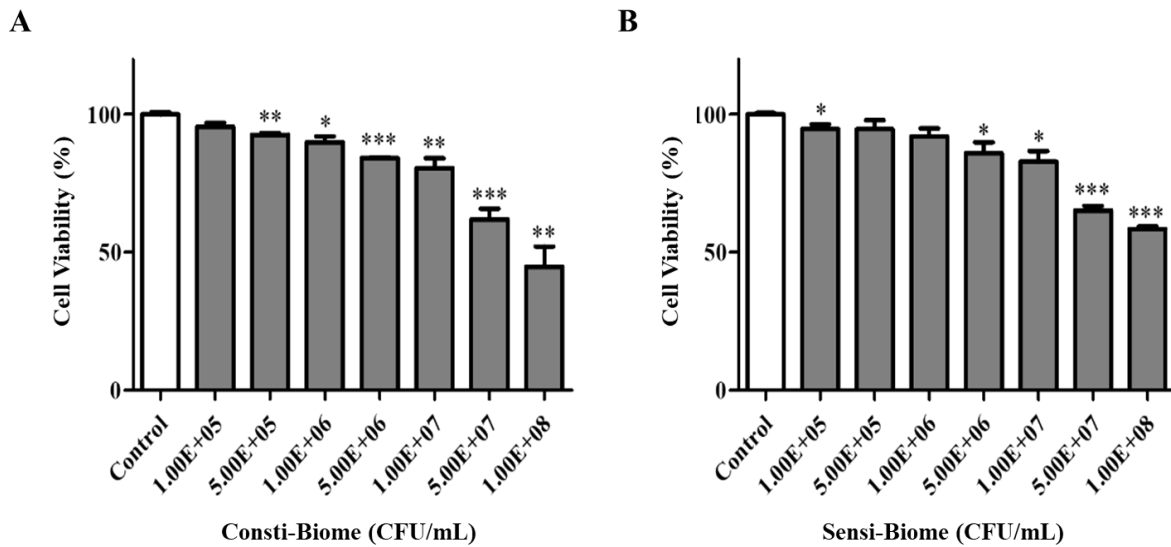

**Supplementary Fig. S1. Effect of Consti-Biome and Sensi-Biome on RAW264.7 cell viability.**

RAW264.7 cells were seeded in 96-well plates for 24 h. Cells were treated with (A) Consti-Biome or (B) Sensi-Biome in a dose-dependent manner for 24 h. Viability was assessed by MTT assay and expressed as a percentage (%) of control. The values are expressed as the mean  $\pm$  SD. A significant difference from the control was indicated as, \*  $p < 0.05$ , \*\*  $p < 0.01$ , or \*\*\*  $p < 0.001$ .
